# Supplementary material for: Effects of Lactoferrin on Oral and Throat Conditions under Low Humidity Environments: A Randomized, Double-Blind, and Placebo-Controlled Crossover Trial
Source: MDPI journal article supplement (doi:10.3390/nu15184033), 2023-09-18
Supplement: s1 [file s1]

**Table S1.** Correration between the change in UWSFR ( $\Delta 0-1$  h) and VAS value (2 h)

| <b>Outcome (VAS)</b> | <b>r</b> | <b>P-value</b> |
|----------------------|----------|----------------|
| Oral discomfort      | -0.277   | 0.022          |
| Throat discomfort    | -0.284   | 0.019          |

r: correlation coefficient
